# Supplementary material for: Prognostic Factors for Event-Free Survival in Pediatric Patients with Hepatoblastoma Based on the 2017 PRETEXT and CHIC-HS Systems
Source: Cancers (Basel). 2019 Sep 18;11(9):1387. doi: 10.3390/cancers11091387 (PMC6769992; doi:10.3390/cancers11091387)
Supplement: Supplementary file 1 [file cancers-11-01387-s001.pdf]

# Supplementary Materials: Prognostic Factors for Event-Free Survival in Pediatric Patients with Hepatoblastoma Based on The 2017 PRETEXT and CHIC-HS Systems

Hee Mang Yoon, Jisun Hwang, Kyung Won Kim, Jung-Man Namgoong, Dae Yeon Kim, Kyung-Nam Koh, Hyery Kim, and Young Ah Cho

**Table S1.** 2017 PRETEXT groups and annotation factors.

| PRETEXT Groups                     | Definition                                                                                                                                                                                                                                                      |
|------------------------------------|-----------------------------------------------------------------------------------------------------------------------------------------------------------------------------------------------------------------------------------------------------------------|
| I                                  | 3 contiguous hepatic sections are free of tumor                                                                                                                                                                                                                 |
| II                                 | 2 contiguous hepatic sections are free of tumor                                                                                                                                                                                                                 |
| III                                | 1 contiguous hepatic section is free of tumor                                                                                                                                                                                                                   |
| IV                                 | Tumor affects all four hepatic sections (almost always multifocal or infiltrative)                                                                                                                                                                              |
| Annotation Factors                 | Positive Definition                                                                                                                                                                                                                                             |
| Hepatic venous/IVC involvement (V) | Any of the following criteria:<br>Tumor obliterates or encases all three hepatic veins <sup>a</sup> or the intrahepatic IVC<br>Tumor thrombus in any hepatic vein <sup>a</sup> or the intrahepatic IVC                                                          |
| Portal venous involvement (P)      | Any of the following criteria:<br>Tumor obliterates or encases either both portal veins <sup>b</sup> or the main portal vein<br>Tumor thrombus in either or both the right and left portal veins <sup>b</sup> or the main portal vein                           |
| Extrahepatic tumor extension (E)   | Any of the following criteria:<br>Tumor crosses boundaries or tissue planes<br>Tumor is surrounded by normal tissue more than 180°<br>Peritoneal nodules: one nodule ≥ 10 mm or two or more nodules ≥ 5 mm                                                      |
| Multifocality (F)                  | Two or more separate hepatic tumors with normal liver tissue between the tumors                                                                                                                                                                                 |
| Tumor rupture (R)                  | Any findings of hemorrhage on imaging (Ultrasound, CT, MRI)                                                                                                                                                                                                     |
| Caudate lobe (C)                   | Pathologically diagnosed after paracentesis/upfront resection<br>Tumor involving the caudate lobe                                                                                                                                                               |
| Lymph node metastasis (N)          | Considered when any of the following morphologic criteria is met (less sensitive for detection):<br>Lymph node with short-axis diameter > 1 cm<br>Portocaval lymph node with short-axis diameter > 1.5 cm<br>Spherical lymph node shape with absent fatty hilum |
| Distant metastasis (M)             | Any of the following criteria for pulmonary metastasis:<br>Single non-calcified lung lesion with diameter ≥ 5 mm<br>Two or more non-calcified lung lesions with each diameter ≥ 3 mm<br>Any metastases diagnosed via pathology                                  |

IVC = inferior vena cava. <sup>a</sup> First-order hepatic vein: between its confluence with IVC and its most central branch. <sup>b</sup> First-order portal vein: between the bifurcation and the first major branch of the portal vein.

**Table S2.** Surgical treatment of patients with annotation factors V and P-positive.

| Criteria for the assignment of V and P-positive | Total | Resection, N (%) | OLTx, N (%) |
|-------------------------------------------------|-------|------------------|-------------|
| V (HV or IVC involvement)                       | 31    |                  |             |
| Tumor obliterates or encases all three HV       | 9     | 1 (11.1)         | 4 (44.4)    |
| Tumor obliterates or encases IVC                | 21    | 7 (33.3)         | 5 (23.8)    |
| Tumor thrombus in HV                            | 3     | 2 (66.7)         | 1 (33.3)    |
| Tumor thrombus in IVC                           | 4     | 3 (75.0)         | 0           |
| P (PV involvement)                              | 15    |                  |             |
| Tumor obliterates or encases both PV            | 6     | 2 (33.3)         | 2 (33.3)    |
| Tumor obliterates or encases main PV            | 5     | 1 (20.0)         | 2 (40.0)    |
| Thrombus within a first-order PV                | 7     | 0                | 1 (14.3)    |
| Thrombus within main PV                         | 1     | 0                | 1 (100)     |

OLTx, orthotopic liver transplantation; HV, hepatic vein; IVC, inferior vena cava; PV, portal vein.

**Table 3.** Performance measures of Cox proportional hazard models to predict EFS.

| Model Type    | Discrimination      |                                 |
|---------------|---------------------|---------------------------------|
|               | C-statistic         | Optimism-Corrected C-Statistic* |
| PRETEXT group | 0.663 (0.535–0.791) | 0.623 (0.495–0.751)             |
| VPEFR†        | 0.639 (0.523–0.755) | 0.636 (0.520–0.752)             |
| F+M model     | 0.734 (0.612–0.854) | 0.718 (0.598–0.837)             |

Data in parentheses are 95% confidence intervals; \* Optimism-corrected C-statistic obtained from bootstrapping method; † One or more of V, P, E, F, or R present.

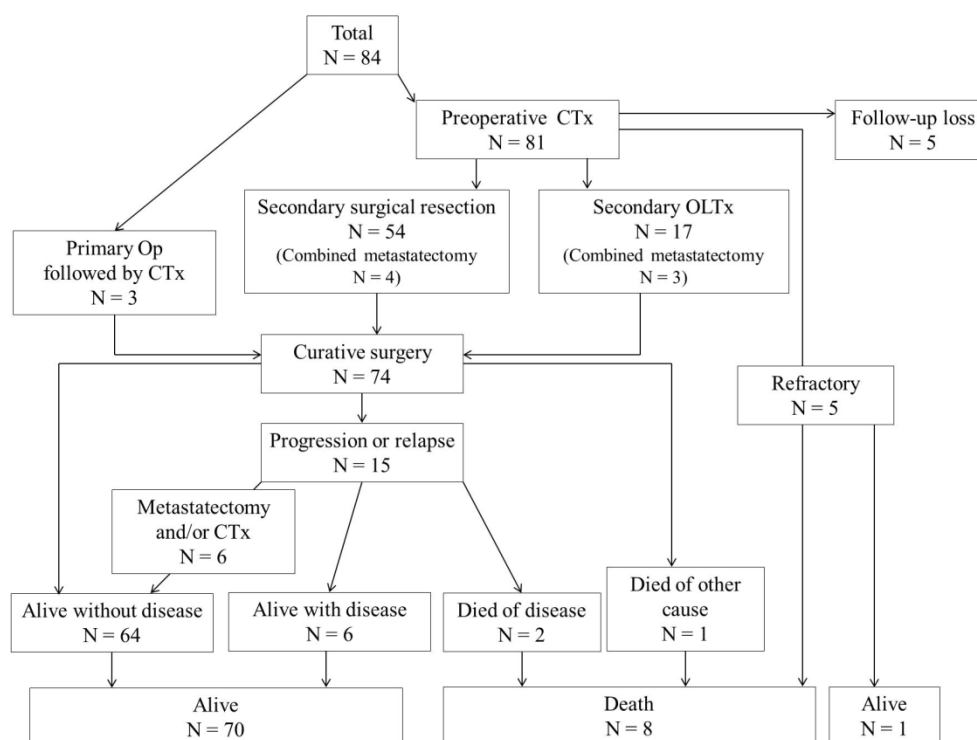**Figure S1.** Clinical course of patients. CTx, chemotherapy; Op, operation; OLTx, orthotopic liver transplantation.

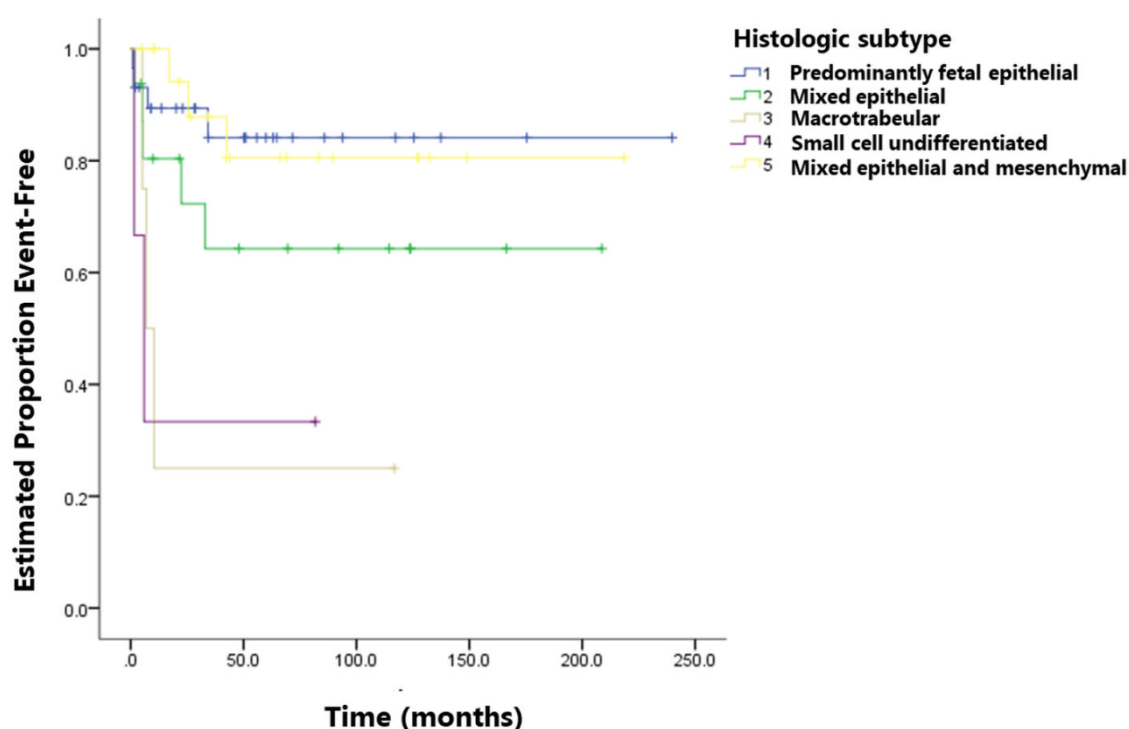

**Figure S2.** Effect of histologic subtypes on event-free survival. In the Kaplan–Meier curves of event-free survival according to the histologic subtype, the mean EFS was 203.9 months (95% CI of 171.1–236.6 months) for patients with predominantly fetal epithelial subtype, 139.4 months (95% CI of 90.1–188.7 months) for patients with mixed epithelial subtype, 34.9 months (95% CI of 0.0–81.2 months) for patients with macrotrabecular subtype, 29.8 months (95% CI of 0.0–71.5 months) for patients with small cell undifferentiated subtype, and 181.6 months (95% CI of 144.0–219.2 months) for patients with mixed epithelial and mesenchymal subtype, respectively. There were statistical significances in mean EFS between predominantly fetal epithelial subtype vs. macrotrabecular subtype ( $p = 0.004$ ), and predominantly fetal epithelial subtype vs. small cell undifferentiated subtype ( $p = 0.017$ ).

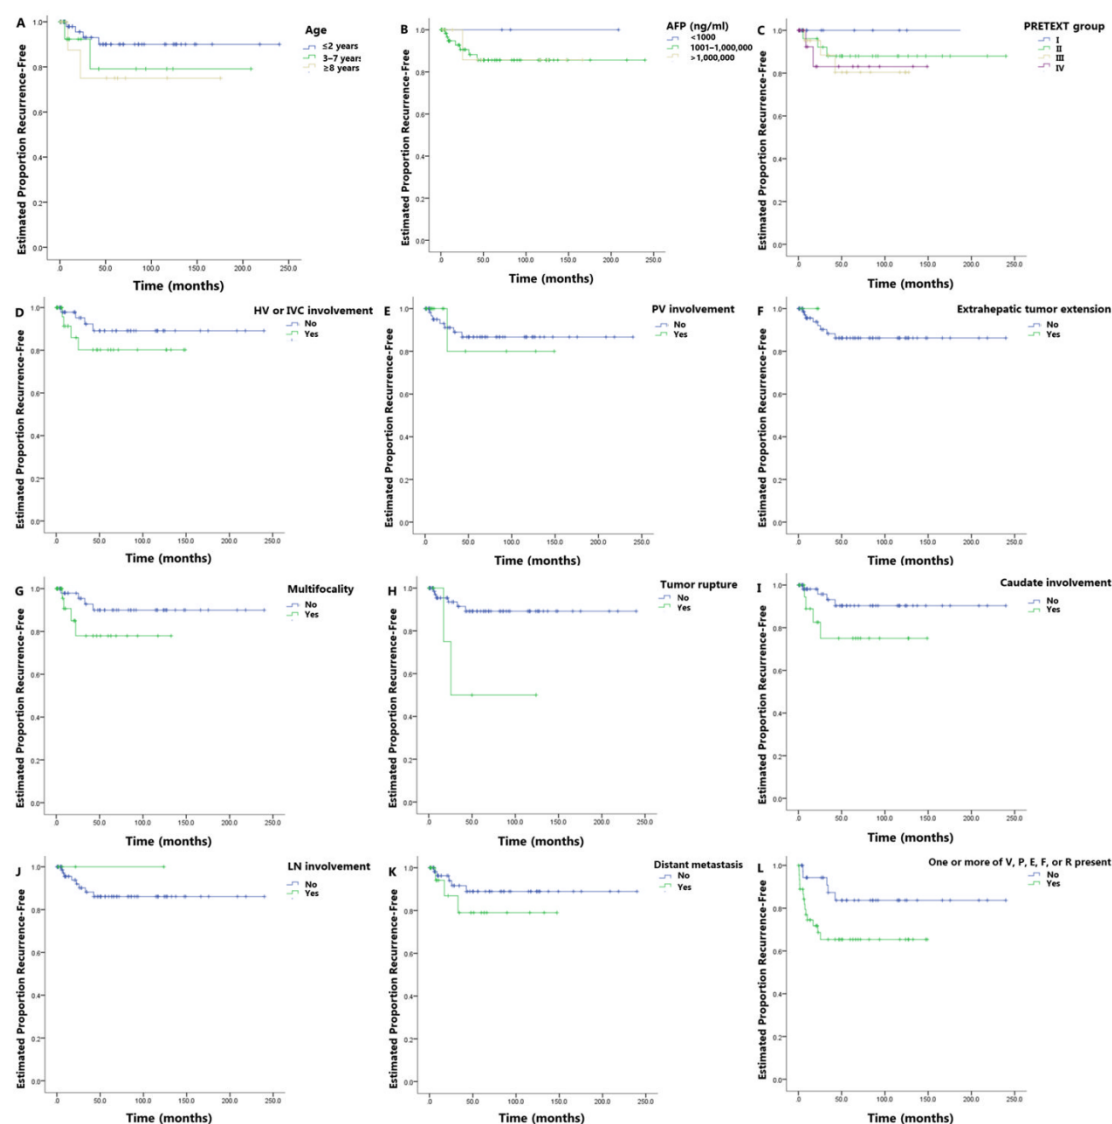

**Figure S3.** Kaplan-Meier (KM) curves of recurrence-free survival (RFS). Figure 3A. KM curves according to age at initial presentation. The mean RFS was 218.3 months (95% CI, 198.2–238.4 months) for patients  $\leq 2$  years, 169.9 months (95% CI of 120.5–219.2 months) for patients aged 3–7 years, and 135.5 months for patients  $\geq 8$  years (95% CI of 87.5–183.6 months), respectively. There was no significant difference in mean RFS among three groups ( $p = 0.376$ ). Figure 3B. KM curves according to serum alpha-fetoprotein (AFP) levels at initial presentation. The mean RFS of patients with AFP  $< 1000$  ng/mL was not estimated because no event was observed in this group. The mean RFS was 208.4 months (95% CI, 186.6–230.1 months) for patients with AFP of 1001–1000000 ng/mL, and 146.3 months (95% CI, 109.8–182.8 months) for patients with AFP more than 1000000 ng/mL, respectively. There was no significant difference in mean RFS between two groups ( $p = 0.938$ ). Figure 3C. KM curves according to PRETEXT group. The mean RFS was 213.4 months (95% CI, 185.4–241.5 months) for patients with group II, 108.1 months (95% CI, 88.0–128.2 months) for patients with group III, and 125.9 months (95% CI, 96.8–155.1 months) for patients with group IV, respectively. The mean RFS of PRETEXT group I was not estimated because no event had been observed in this group. There was no significant difference in mean RFS among four groups ( $p = 0.657$ ). Figure 3D. KM curves according to HV or IVC involvement (V). The mean RFS was 216.7 months (95% CI, 195.2–238.2 months) for patients with negative V, and 122.5 months (95% CI, 99.1–145.9 months) for patients with positive V, respectively. There was no significant difference in mean EFS between two groups ( $p = 0.271$ ). Figure 3E. KM curves according to PV involvement (P). The mean RFS was 210.7 months (95% CI, 190.5–230.9 months) for patients with negative P, and 124.2 months (95% CI, 81.0–167.5 months)

for patients with positive P, respectively. There was no significant difference in mean RFS between two groups ( $p = 0.950$ ). Figure 3F. KM curves according to extrahepatic tumor extension (E). The mean RFS was 209.8 months (95% CI, 190.3–229.2 months) for patients with negative E. The mean EFS of patients with positive E was not estimated because no event had been observed in this group. There was no significant difference in mean EFS between two groups ( $p = 0.703$ ). Figure 3G. KM curves according to multifocality (F). The mean RFS was 218.5 months (95% CI, 198.7–238.4 months) for patients with negative F, and 106.5 months (95% CI, 83.7–129.4 months) for patients with positive F, respectively. There was no significant difference in mean RFS between two groups ( $p = 0.141$ ). Figure 3H. KM curves according to tumor rupture (R). The mean RFS was 216.3 months (95% CI, 198.3–234.2 months) for patients with negative R, and 72.7 months (95% CI, 22.3–123.1 months) for patients with positive R, respectively. There was significant difference in mean RFS between two groups ( $p = 0.020$ ). Figure 3I. KM curves according to caudate involvement (C). The mean RFS was 219.3 months (95% CI, 200.0–238.5 months) for patients with negative C, and 115.6 months (95% CI, 87.0–144.2 months) for patients with positive C, respectively. There was no significant difference in mean EFS between two groups ( $p = 0.085$ ). Figure 3J. KM curves according to lymph node involvement (N). The mean RFS was 209.5 months (95% CI, 189.9–229.1 months) for patients with negative N. The mean RFS of patients with positive N was not estimated because no event had been observed in this group. There was no significant difference in mean EFS between two groups ( $p = 0.634$ ). Figure 3K. KM curves according to distant metastasis (M). The mean RFS was 215.8 months (95% CI, 195.7–235.8 months) for patients with negative M, and 120.6 months (95% CI, 93.5–147.7 months) for patients with positive M, respectively. There was no significant difference in mean RFS between two groups ( $p = 0.313$ ). Figure 3L. KM curves of recurrence-free survival (RFS) according to presence of one or more of VPEFR. The mean RFS was 217.8 months (95% CI, 194.1–241.5 months) for patients with negative VPEFR, and 126.0 months (95% CI, 107.6–144.5 months) for patients with positive VPEFR, respectively. There was no significant difference in mean RFS between two groups ( $p = 0.366$ ).

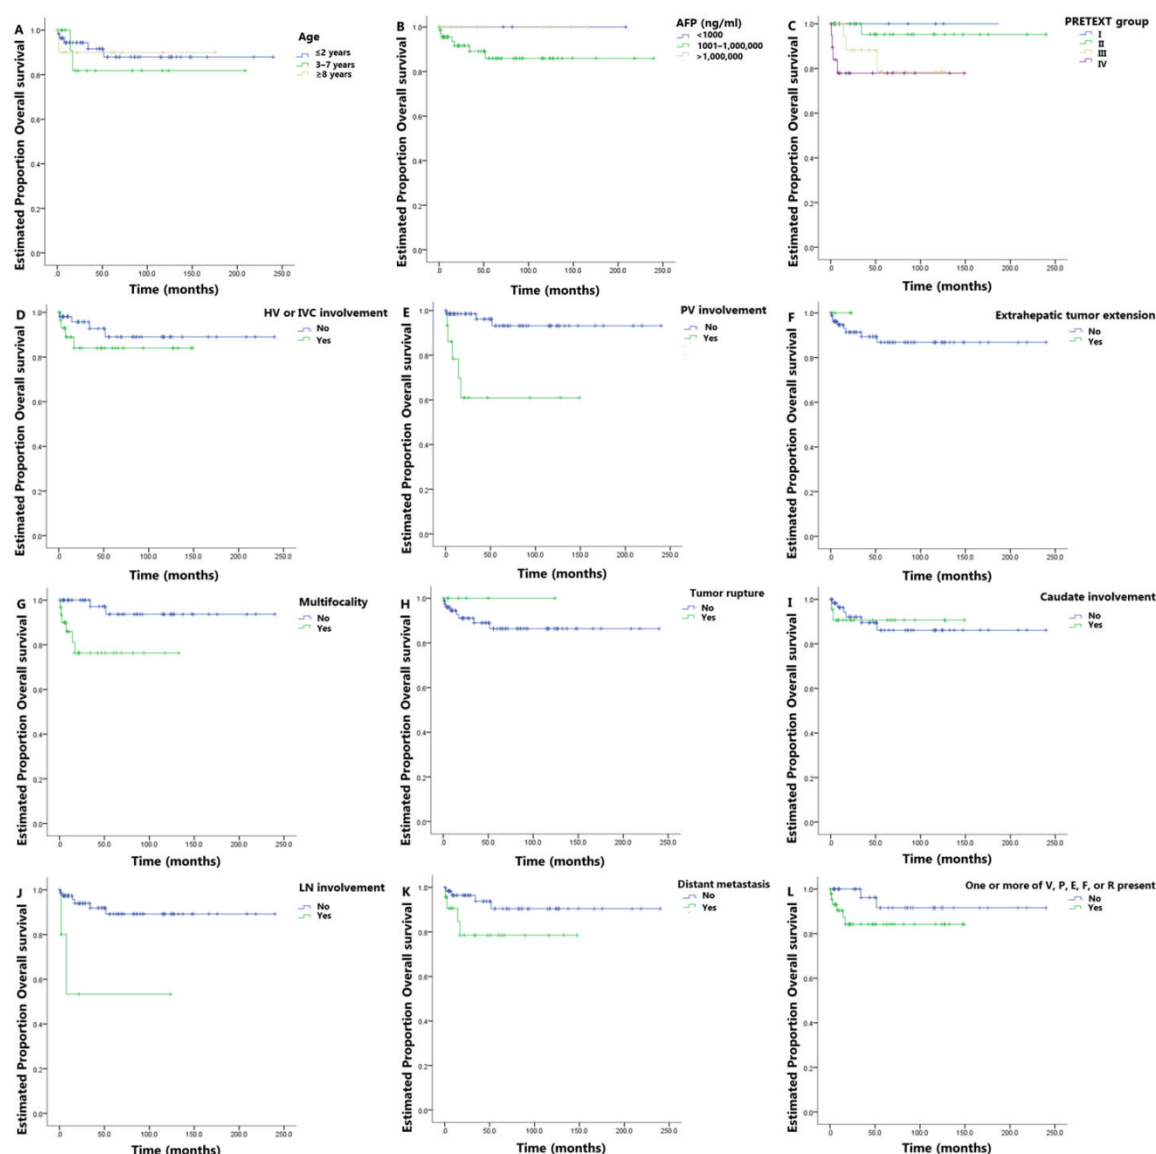

**Figure S4.** Kaplan-Meier (KM) Curves of Overall Survival (OS). Figure 4A. KM curves according to age at initial presentation. The mean OS was 213.9 months (95% CI of 192.1–235.8 months) for patients  $\leq 2$  years, 173.6 months (95% CI of 129.6–217.6 months) for patients aged 3–8 years, and 158.1 months for patients  $\geq 8$  years (95% CI of 125.8–190.4 months), respectively. There was no significant difference in mean OS among three groups ( $p = 0.835$ ). Figure 4B. KM curves according to serum alpha-fetoprotein (AFP) levels at initial presentation. The mean OS of patients with AFP  $< 1000$  ng/mL and 1001–1000000 ng/mL was not estimated because no event was observed in these groups. The mean OS was 209.3 months (95% CI, 187.7–230.9 months) for patients with AFP of 1001–1000000 ng/mL. There was no significant difference in mean RFS between two groups ( $p = 0.476$ ). Figure 4C. KM curves according to PRETEXT group. The mean RFS was 230.0 months (95% CI, 211.3–248.7 months) for patients with group II, 107.0 months (95% CI, 86.0–128.0 months) for patients with group III, and 116.7 months (95% CI, 88.7–144.7 months) for patients with group IV, respectively. The mean RFS of PRETEXT group I was not estimated because no event had been observed in this group. There was no significant difference in mean RFS among four groups ( $p = 0.077$ ). Figure 4D. KM curves according to HV or IVC involvement (V). The mean OS was 216.7 months (95% CI, 195.2–238.2 months) for patients with negative V, and 126.4 months (95% CI, 105.9–146.8 months) for patients with positive V, respectively. There was no significant difference in mean EFS between two groups ( $p = 0.295$ ). Figure 4E. KM curves according to PV involvement (P). The mean OS was 225.8 months (95% CI, 210.2–241.4 months) for patients with negative P, and 94.3 months (95% CI, 56.4–132.2 months) for patients with positive P, respectively. There was a significant difference in mean OS between two groups ( $p < 0.001$ ). Figure 4F. KM curves according to

extrahepatic tumor extension (E). The mean RFS was 210.9 months (95% CI, 191.8–230.0 months) for patients with negative E. The mean OS of patients with positive E was not estimated because no event had been observed in this group. There was no significant difference in mean EFS between two groups ( $p = 0.621$ ). Figure 4G. KM curves according to multifocality (F). The mean OS was 227.4 months (95% CI, 210.7–244.1 months) for patients with negative F, and 103.1 months (95% CI, 82.2–124.0 months) for patients with positive F, respectively. There was a significant difference in mean OS between two groups ( $p = 0.006$ ). Figure 4H. KM curves according to tumor rupture (R). The mean OS was 209.9 months (95% CI, 190.3–229.6 months) for patients with negative R. The mean OS of patients with positive R was not estimated because no event had been observed in this group. There was no significant difference in mean EFS between two groups ( $p = 0.468$ ). Figure 4I. KM curves according to caudate involvement (C). The mean OS was 210.0 months (95% CI, 187.3–232.6 months) for patients with negative C, and 135.2 months (95% CI, 117.1–153.3 months) for patients with positive C, respectively. There was no significant difference in mean OS between two groups ( $p = 0.992$ ). Figure 4J. KM curves according to lymph node involvement (N). The mean OS was 216.6 months (95% CI, 198.6–234.5 months) for patients with negative N, and 68.3 months (95% CI, 10.8–125.8 months) for patients with positive N. There was a significant difference in mean OS between two groups ( $p = 0.003$ ). Figure 4K. KM curves according to distant metastasis (M). The mean OS was 219.6 months (95% CI, 200.4–238.9 months) for patients with negative M, and 117.7 months (95% CI, 91.8–143.7 months) for patients with positive M, respectively. There was no significant difference in mean RFS between two groups ( $p = 0.084$ ). Figure 4L. KM curves according to presence of one or more of VPEFR. The mean OS was 223.3 months (95% CI, 201.3–245.3 months) for patients with negative VPEFR, and 126.6 months (95% CI, 110.1–143.1 months) for patients with positive VPEFR, respectively. There was no significant difference in mean RFS between two groups ( $p = 0.137$ ).

#### **Supplementary Figure Legend for Figure 2. Kaplan-Meier (KM) Curves of Event-Free Survival (EFS).**

Figure 2A. KM curves according to age at initial presentation. The mean EFS was 197.3 months (95% CI, 172.0–222.6 months) for patients  $\leq 2$  years, 131.9 months (95% CI of 78.4–185.5 months) for patients aged 3–7 years, and 102.0 months for patients  $\geq 8$  years (95% CI of 53.3–150.8 months), respectively. There was no significant difference in mean EFS among three groups ( $p = 0.078$ ).

Figure 2B. KM curves according to serum alpha-fetoprotein (AFP) levels at initial presentation. The mean EFS of patients with AFP  $< 1000$  ng/mL was not estimated because no event was observed in this group. The mean EFS was 175.9 months (95% CI, 149.8–202.0 months) for patients with AFP of 1001–1000000 ng/mL, and 146.3 months (95% CI, 109.8–182.8 months) for patients with AFP more than 1000000 ng/mL, respectively. There was no significant difference in mean EFS between two groups ( $p = 0.389$ ).

Figure 2C. KM curves according to PRETEXT group. The mean EFS was 190.7 months (95% CI, 155.9–222.5 months) for patients with group II, 93.7 months (95% CI, 70.7–116.6 months) for patients with group III, and 92.7 months (95% CI, 60.0–125.5 months) for patients with group IV, respectively. The mean EFS of PRETEXT group I was not estimated because no event had been observed in this group. There was no significant difference in mean EFS among four groups ( $p = 0.106$ ).

Figure 2D. KM curves according to HV or IVC involvement (V). The mean EFS was 194.6 months (95% CI, 167.9–221.2 months) for patients with negative V, and 97.6 months (95% CI, 72.0–123.3 months) for patients with positive V, respectively. There was no significant difference in mean EFS between two groups ( $p = 0.079$ ).

Figure 2E. KM curves according to PV involvement (P). The mean EFS was 191.0 months (95% CI, 167.4–214.7 months) for patients with negative P, and 79.9 months (95% CI, 38.5–121.3 months) for patients with positive P, respectively. There was a significant difference in mean EFS between two groups ( $p = 0.030$ ).

Figure 2F. KM curves according to extrahepatic tumor extension (E). The mean EFS was 179.3 months (95% CI, 155.8–202.8 months) for patients with negative E. The mean EFS of patients with positive E was not estimated because no event had been observed in this group. There was no significant difference in mean EFS between two groups ( $p = 0.456$ ).

Figure 2G. KM curves according to multifocality (F). The mean EFS was 204.9 months (95% CI, 181.1–228.7 months) for patients with negative F, and 78.1 months (95% CI, 54.4–101.7 months) for patients with positive F, respectively. There was a significant difference in mean EFS between two groups ( $p = 0.002$ ).

Figure 2H. KM curves according to tumor rupture (R). The mean EFS was 186.6 months (95% CI, 163.5–209.7 months) for patients with negative R, and 59.2 months (95% CI, 12.5–105.9 months) for patients with positive R, respectively. There was no significant difference in mean EFS between two groups ( $p = 0.089$ ).

Figure 2I. KM curves according to caudate involvement (C). The mean EFS was 184.9 months (95% CI, 158.6–211.1 months) for patients with negative C, and 105.2 months (95% CI, 75.7–134.6 months) for patients with positive C, respectively. There was no significant difference in mean EFS between two groups ( $p = 0.492$ ).

Figure 2J. KM curves according to lymph node involvement (N). The mean EFS was 183.8 months (95% CI, 160.5–207.1 months) for patients with negative N, and 67.9 months (95% CI, 9.9–125.8 months) for patients with positive N, respectively. There was no significant difference in mean EFS between two groups ( $p = 0.133$ ).

Figure 2K. KM curves according to distant metastasis (M). The mean EFS was 199.7 months (95% CI, 175.8–223.7 months) for patients with negative M, and 83.2 months (95% CI, 53.8–112.7 months) for patients with positive M, respectively. There was a significant difference in mean EFS between two groups ( $p = 0.003$ ).

Figure 2L. KM curves according to presence of one or more of VPEFR. The mean EFS was 204.8 months (95% CI, 176.6–233.0 months) for patients with negative VPEFR, and 100.6 months (95% CI, 79.7–121.4 months) for patients with positive VPEFR, respectively. There was a significant difference in mean EFS between two groups ( $p = 0.035$ ).

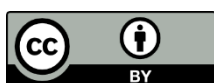

© 2019 by the authors. Licensee MDPI, Basel, Switzerland. This article is an open access article distributed under the terms and conditions of the Creative Commons Attribution (CC BY) license (<http://creativecommons.org/licenses/by/4.0/>).
